# Supplementary material for: Integrative multi-omics analysis reveals novel idiopathic pulmonary fibrosis endotypes associated with disease progression
Source: Respir Res. 2023 May 31;24:141. doi: 10.1186/s12931-023-02435-0 (PMC10283254; doi:10.1186/s12931-023-02435-0)
Supplement: Supplementary file 6 — Additional file 6: Table S8. Canonical pathways that were significantly enriched (FDR p-value < 0.05) for genes associated with down-regulated proteins. [file 12931_2023_2435_MOESM6_ESM.xlsx]

## Sheet: Table S8
Ingenuity Canonical Pathways	Adjusted p-value	Ratio*	Genes
Opioid Signaling Pathway	1.76e-08	0.619	AKT2,BAD,CAMK2A,CAMK2B,CAMK2D,FGR,FYN,GRK2,LYN,MAP2K3,MAPK1,MAPK12,MAPK3,PDK1,PRKACA,PRKCA,PRKCB,PRKCD,PRKCI,PRKCQ,RAC1,RAC3,RPS6KA3,RPS6KA5,SRC,YES1
B Cell Receptor Signaling	3.04e-07	0.581	AKT2,BAD,BCL2L1,BTK,CAMK2A,CAMK2B,CAMK2D,CFL1,CSK,GRB2,LYN,MAP2K3,MAPK1,MAPK12,MAPK14,MAPK3,MAPK8,PDPK1,PRKCB,PRKCQ,PTPN11,PTPN6,RAC1,SHC1,VAV1
Reelin Signaling in Neurons	1.36e-06	0.645	AKT2,APP,CAMK2A,CAMK2B,CAMK2D,CFL1,CRK,FGR,FYN,LYN,MAP2K3,MAPK1,MAPK12,MAPK3,MAPK8,PAFAH1B2,PDK1,RAC1,SRC,YES1
Molecular Mechanisms of Cancer	3.25e-06	0.429	AKT2,BAD,BCL2,BCL2L1,BID,CAMK2A,CAMK2B,CAMK2D,CASP3,CRK,DHH,FYN,GRB2,HDAC8,MAP2K3,MAPK1,MAPK12,MAPK14,MAPK3,MAPK8,MDM2,PA2G4,PAK6,PRKACA,PRKCA,PRKCB,PRKCD,PRKCI,PRKCQ,PTPN11,RAC1,RAC3,SHC1,SMAD2,SMAD3,SRC
Insulin Secretion Signaling Pathway	3.81e-06	0.532	CAMK2A,CAMK2B,CAMK2D,EIF4G2,FGR,FYN,LYN,MAPK1,MAPK12,MAPK14,MAPK3,NAPA,PDIA3,PRKACA,PRKCA,PRKCB,PRKCD,PRKCI,PRKCQ,RPS6KA5,SRC,STAT1,STAT3,STAT6,YES1
FLT3 Signaling in Hematopoietic Progenitor Cells	1.15e-05	0.696	AKT2,BAD,FLT3,GRB2,MAPK1,MAPK12,MAPK14,MAPK3,PDPK1,PTPN11,RPS6KA3,RPS6KA5,SHC1,STAT1,STAT3,STAT6
ERK/MAPK Signaling	1.44e-05	0.55	BAD,CRK,FYN,GRB2,HSPB1,MAPK1,MAPK3,PAK6,PRKACA,PRKCA,PRKCB,PRKCD,PRKCI,RAC1,RAC3,RPS6KA5,SHC1,SRC,STAT1,STAT3,YWHAB,YWHAZ
IL-3 Signaling	3.87e-05	0.63	AKT2,BAD,GRB2,IL3RA,MAPK1,MAPK3,PRKCA,PRKCB,PRKCD,PRKCI,PRKCQ,PTPN6,RAC1,SHC1,STAT1,STAT3,STAT6
Glycolysis I	4.86e-05	1	ALDOA,ENO1,ENO2,GAPDH,GPI,PGAM1,PGK1,PKM,TPI1
Thrombin Signaling	5.08e-05	0.556	AKT2,CAMK2A,CAMK2B,CAMK2D,GRB2,MAPK1,MAPK12,MAPK14,MAPK3,PDIA3,PDPK1,PRKCA,PRKCB,PRKCD,PRKCI,PRKCQ,RAC1,RAC3,SHC1,SRC
Fcγ Receptor-mediated Phagocytosis in Macrophages and Monocytes	8.4e-05	0.607	AKT2,CRK,FGR,FYN,LYN,MAPK1,MAPK3,PRKCA,PRKCB,PRKCD,PRKCI,PRKCQ,RAC1,RAC3,SRC,VAV1,YES1
G-Protein Coupled Receptor Signaling	9.19e-05	0.581	AKT2,CAMK2A,CAMK2B,CAMK2D,FYN,GRB2,GRK2,MAPK1,MAPK3,PDE11A,PDE5A,PDPK1,PRKACA,PRKCA,PRKCB,SHC1,SRC,STAT3
GNRH Signaling	0.000178837	0.543	CAMK2A,CAMK2B,CAMK2D,GRB2,MAP2K3,MAPK1,MAPK12,MAPK14,MAPK3,MAPK8,PAK6,PRKACA,PRKCA,PRKCB,PRKCD,PRKCI,PRKCQ,RAC1,SRC
p70S6K Signaling	0.000178837	0.543	AKT2,BAD,BTK,GRB2,IL2RG,LYN,MAPK1,MAPK3,PDIA3,PDPK1,PRKCA,PRKCB,PRKCD,PRKCI,PRKCQ,SHC1,SRC,YWHAB,YWHAZ
HER-2 Signaling in Breast Cancer	0.000195177	0.479	AKT2,AREG,BAD,CASP3,DDX19B,FGR,FYN,GRB2,KPNB1,LYN,MAPK1,MAPK3,MDM2,PDK1,PRKCA,PRKCB,PRKCD,PRKCI,PRKCQ,SMAD3,SRC,STAT3,YES1
G Beta Gamma Signaling	0.000203896	0.667	AKT2,BTK,GRB2,MAPK1,MAPK3,PDPK1,PRKACA,PRKCA,PRKCB,PRKCD,PRKCI,PRKCQ,SHC1,SRC
Role of NFAT in Cardiac Hypertrophy	0.000228239	0.489	AKT2,CAMK2A,CAMK2B,CAMK2D,GRB2,HDAC8,IL6,MAP2K3,MAPK1,MAPK12,MAPK14,MAPK3,MAPK8,PDIA3,PRKACA,PRKCA,PRKCB,PRKCD,PRKCI,PRKCQ,SHC1,SRC
Gluconeogenesis I	0.000280134	1	ALDOA,ENO1,ENO2,GAPDH,GPI,MDH1,PGAM1,PGK1
mTOR Signaling	0.000328353	0.545	AKT2,EIF4G2,MAPK1,MAPK3,PDPK1,PRKCA,PRKCB,PRKCD,PRKCI,PRKCQ,RAC1,RAC3,RPS27A,RPS3,RPS6KA3,RPS6KA5,RPS7,VEGFC
Melatonin Signaling	0.000343014	0.684	CAMK2A,CAMK2B,CAMK2D,MAP2K3,MAPK1,MAPK3,PDIA3,PRKACA,PRKCA,PRKCB,PRKCD,PRKCI,PRKCQ
TEC Kinase Signaling	0.000421	0.488	BTK,FGR,FYN,LYN,MAPK12,MAPK8,PAK6,PRKCA,PRKCB,PRKCD,PRKCI,PRKCQ,RAC1,RAC3,SRC,STAT1,STAT3,STAT6,TEC,VAV1,YES1
FGF Signaling	0.000421	0.488	AKT2,CRK,FGF16,FGF2,FGF6,FGF7,FGF8,GRB2,MAP2K3,MAPK1,MAPK12,MAPK14,MAPK3,MAPK8,MAPKAPK2,PRKCA,PTPN11,PTPN6,RAC1,RPS6KA5,STAT3
GP6 Signaling Pathway	0.000565215	0.6	AKT2,BTK,COL23A1,FYN,GP6,GRB2,LYN,PDPK1,PRKCA,PRKCB,PRKCD,PRKCI,PRKCQ,RAC1,VAV1
Protein Kinase A Signaling	0.000604194	0.444	ACP1,BAD,CAMK2A,CAMK2B,CAMK2D,DHH,DUSP3,MAPK1,MAPK3,PDE11A,PDE5A,PDIA3,PRKACA,PRKCA,PRKCB,PRKCD,PRKCI,PRKCQ,PTPN1,PTPN11,PTPN6,SMAD3,YWHAB,YWHAZ
Fc Epsilon RI Signaling	0.000692048	0.477	AKT2,BTK,FYN,GRB2,LYN,MAP2K3,MAPK1,MAPK12,MAPK14,MAPK3,MAPK8,PDPK1,PRKCA,PRKCB,PRKCD,PRKCI,PRKCQ,PTPN11,RAC1,RAC3,VAV1
Gαq Signaling	0.000830029	0.65	AKT2,BTK,CSK,GRK2,MAPK1,MAPK3,PRKCA,PRKCB,PRKCD,PRKCI,PRKCQ,RAC1,RAC3
Phospholipase C Signaling	0.0010187	0.514	BTK,FYN,GRB2,HDAC8,LYN,MAPK1,MAPK3,PEBP1,PRKCA,PRKCB,PRKCD,PRKCI,PRKCQ,RAC1,RAC3,RPS6KA3,SHC1,SRC
Androgen Signaling	0.00143549	0.667	DNAJB1,MAPK1,MAPK3,PRKACA,PRKCA,PRKCB,PRKCD,PRKCI,PRKCQ,SHC1,SMAD3,SRC
RAR Activation	0.00149951	0.487	AKT2,CSK,IL3RA,MAPK1,MAPK12,MAPK14,MAPK8,MAPKAPK2,PDPK1,PRKACA,PRKCA,PRKCB,PRKCD,PRKCI,PRKCQ,RAC1,SMAD2,SMAD3,SRC
Renin-Angiotensin Signaling	0.00149951	0.487	CCL5,GRB2,MAPK1,MAPK12,MAPK14,MAPK3,MAPK8,PAK6,PRKACA,PRKCA,PRKCB,PRKCD,PRKCI,PRKCQ,PTPN6,RAC1,SHC1,STAT1,STAT3
Neuropathic Pain Signaling In Dorsal Horn Neurons	0.00183587	0.619	CAMK2A,CAMK2B,CAMK2D,MAPK1,MAPK3,PDIA3,PRKACA,PRKCA,PRKCB,PRKCD,PRKCI,PRKCQ,SRC
Insulin Receptor Signaling	0.00205487	0.583	AKT2,BAD,CRK,FYN,GRB2,MAPK1,MAPK3,MAPK8,PDPK1,PRKACA,PRKCI,PTPN1,PTPN11,SHC1
GM-CSF Signaling	0.00205487	0.583	AKT2,BCL2L1,CAMK2A,CAMK2B,CAMK2D,GRB2,LYN,MAPK1,MAPK3,PRKCB,PTPN11,SHC1,STAT1,STAT3
CXCR4 Signaling	0.00205487	0.533	AKT2,CRK,LYN,MAPK1,MAPK12,MAPK3,MAPK8,PAK6,PRKCA,PRKCB,PRKCD,PRKCI,PRKCQ,RAC1,RAC3,SRC
NRF2-mediated Oxidative Stress Response	0.00281575	0.486	AKR1A1,AKR7A2,CYP3A4,DNAJB1,HSP90AB1,MAP2K3,MAPK1,MAPK14,MAPK3,MAPK8,PRDX1,PRKCA,PRKCB,PRKCD,PRKCI,PRKCQ,SOD1,STIP1
Synaptic Long Term Potentiation	0.00322497	0.632	CAMK2A,CAMK2B,CAMK2D,MAPK1,MAPK3,PDIA3,PRKACA,PRKCA,PRKCB,PRKCD,PRKCI,PRKCQ
Melanocyte Development and Pigmentation Signaling	0.00322497	0.632	BCL2,CRK,GRB2,MAPK1,MAPK3,PRKACA,PTPN11,PTPN6,RPS6KA3,RPS6KA5,SHC1,SRC
JAK/STAT Signaling	0.00368452	0.591	AKT2,BCL2L1,GRB2,IL6,MAPK1,MAPK3,PTPN1,PTPN11,PTPN6,SHC1,STAT1,STAT3,STAT6
ICOS-ICOSL Signaling in T Helper Cells	0.00376101	0.536	AKT2,BAD,CAMK2A,CAMK2B,CAMK2D,CD40LG,CSK,GRB2,ICOSLG/LOC102723996,IL2RG,PDPK1,PRKCQ,RAC1,SHC1,VAV1
Role of Tissue Factor in Cancer	0.00383907	0.438	AKT2,BCL2L1,CASP3,CCN2,CFL1,FGR,FYN,LYN,MAPK1,MAPK12,MAPK14,MAPK3,PDXP,PRKCA,PTPN11,RAC1,RPS6KA3,RPS6KA5,SRC,VEGFC,YES1
NGF Signaling	0.00383907	0.56	AKT2,CRK,GRB2,MAPK1,MAPK12,MAPK3,MAPK8,PDPK1,PRKCD,PTPN11,RAC1,RPS6KA3,RPS6KA5,SHC1
14-3-3-mediated Signaling	0.005153	0.486	AKT2,BAD,GRB2,MAPK1,MAPK12,MAPK3,MAPK8,PDIA3,PRKCA,PRKCB,PRKCD,PRKCI,PRKCQ,SNCA,SRC,YWHAB,YWHAZ
HGF Signaling	0.00662175	0.517	AKT2,GRB2,IL6,MAPK1,MAPK12,MAPK3,MAPK8,PRKCA,PRKCB,PRKCD,PRKCI,PRKCQ,PTPN11,RAC1,STAT3
Glioma Signaling	0.00691645	0.462	AKT2,CAMK2A,CAMK2B,CAMK2D,GRB2,HDAC8,MAPK1,MAPK3,MDM2,PA2G4,PDGFA,PDGFB,PRKCA,PRKCB,PRKCD,PRKCI,PRKCQ,SHC1
Aldosterone Signaling in Epithelial Cells	0.00722421	0.565	DNAJB1,HSP90AB1,HSPB1,HSPD1,MAPK1,MAPK3,PDIA3,PDPK1,PRKCA,PRKCB,PRKCD,PRKCI,PRKCQ
Gαi Signaling	0.0109067	0.875	GRB2,MAPK1,MAPK3,PRKACA,SHC1,SRC,STAT3
PI3K Signaling in B Lymphocytes	0.0111326	0.5	AKT2,BTK,CAMK2A,CAMK2B,CAMK2D,FYN,LYN,MAPK1,MAPK3,PDIA3,PDPK1,PRKCB,PRKCI,RAC1,VAV1
Protein Ubiquitination Pathway	0.0124594	0.519	DNAJB1,HSP90AB1,HSPB1,HSPD1,MDM2,PSMA6,PSME1,RPS27A,SKP1,STUB1,UBE2I,UBE2L3,UBE2N,UCHL1
UVB-Induced MAPK Signaling	0.0130135	0.542	BAD,MAPK1,MAPK12,MAPK14,MAPK3,MAPK8,PRKCA,PRKCB,PRKCD,PRKCI,PRKCQ,RPS6KA3,RPS6KA5
Endocannabinoid Developing Neuron Pathway	0.0132827	0.571	AKT2,MAP2K3,MAPK1,MAPK12,MAPK14,MAPK3,MAPK8,PRKACA,RAC1,RAC3,SRC,STAT3
Huntington's Disease Signaling	0.0166793	0.404	AKT2,BCL2L1,CASP3,DNAJB1,GRB2,HDAC8,MAPK1,MAPK3,MAPK8,NAPA,PDPK1,PRKCA,PRKCB,PRKCD,PRKCI,PRKCQ,PSMA6,PSME1,RPS27A,SHC1,SNCA
Neuregulin Signaling	0.0195463	0.447	AKT2,AREG,BAD,CRK,GRB2,HSP90AB1,MAPK1,MAPK3,PDPK1,PRKCA,PRKCB,PRKCD,PRKCI,PRKCQ,PTPN11,SHC1,SRC
IL-7 Signaling Pathway	0.0208905	0.5	AKT2,BAD,BCL2,FYN,GRB2,IL2RG,LYN,MAPK1,MAPK12,MAPK14,MAPK3,PDPK1,SHC1,STAT1
Growth Hormone Signaling	0.0228471	0.52	MAPK1,MAPK3,PDPK1,PRKCA,PRKCB,PRKCD,PRKCI,PRKCQ,PTPN6,RPS6KA3,RPS6KA5,STAT1,STAT3
Apelin Cardiomyocyte Signaling Pathway	0.024418	0.545	AKT2,MAPK1,MAPK12,MAPK14,MAPK3,MAPK8,PDIA3,PRKCA,PRKCB,PRKCD,PRKCI,PRKCQ
Breast Cancer Regulation by Stathmin1	0.0299631	0.4	CAMK2A,CAMK2B,CAMK2D,FGF2,GRB2,MAPK1,MAPK3,PDGFB,PRKACA,PRKCA,PRKCB,PRKCD,PRKCI,PRKCQ,RAC1,RAC3,RPS6KA3,SHC1,STAT3,VEGFC
Prolactin Signaling	0.0335321	0.483	FYN,GRB2,MAPK1,MAPK3,PDPK1,PRKCA,PRKCB,PRKCD,PRKCI,PRKCQ,PTPN11,SHC1,STAT1,STAT3
VEGF Signaling	0.0335321	0.483	AKT2,BAD,BCL2,BCL2L1,GRB2,MAPK1,MAPK3,PRKCA,PRKCB,PTPN11,PTPN6,SHC1,SRC,VEGFC
Xenobiotic Metabolism Signaling	0.0341349	0.419	AIP,CAMK2A,CAMK2B,CAMK2D,CYP3A4,HSP90AB1,IL6,MAP2K3,MAPK1,MAPK12,MAPK14,MAPK3,MAPK8,PRKCA,PRKCB,PRKCD,PRKCI,PRKCQ
Endothelin-1 Signaling	0.0356503	0.444	CASP3,GRB2,MAPK1,MAPK12,MAPK14,MAPK3,MAPK8,PDIA3,PRDX6,PRKCA,PRKCB,PRKCD,PRKCI,PRKCQ,SHC1,SRC
Cholecystokinin/Gastrin-mediated Signaling	0.0356503	0.444	GRB2,MAP2K3,MAPK1,MAPK12,MAPK14,MAPK3,MAPK8,PRKCA,PRKCB,PRKCD,PRKCI,PRKCQ,RAC1,RAC3,SHC1,SRC
Dilated Cardiomyopathy Signaling Pathway	0.0426367	0.522	AKT2,BAD,BCL2,CAMK2A,CAMK2B,CAMK2D,MAPK1,MAPK12,MAPK14,MAPK3,PRKACA,PTPN11
Regulation of eIF4 and p70S6K Signaling	0.0426367	0.522	AKT2,EIF4G2,GRB2,MAPK1,MAPK12,MAPK14,MAPK3,PDPK1,RPS27A,RPS3,RPS7,SHC1
UVA-Induced MAPK Signaling	0.0426367	0.522	BCL2L1,CASP3,MAPK1,MAPK12,MAPK14,MAPK3,MAPK8,PDIA3,PRKCA,RPS6KA3,RPS6KA5,STAT1
EGF Signaling	0.0426367	0.522	AKT2,GRB2,MAPK1,MAPK12,MAPK14,MAPK3,MAPK8,PRKCA,SHC1,SRC,STAT1,STAT3
Cardiac Hypertrophy Signaling	0.0431706	0.455	GRB2,HSPB1,IL6,MAP2K3,MAPK1,MAPK12,MAPK14,MAPK3,MAPK8,MAPKAPK2,MAPKAPK3,PDIA3,PRKACA,RAC1,RAC3
PDGF Signaling	0.0431706	0.455	ACP1,CRK,GRB2,MAPK1,MAPK3,MAPK8,PDGFA,PDGFB,PRKCA,PRKCB,SHC1,SPHK1,SRC,STAT1,STAT3
Apelin Adipocyte Signaling Pathway	0.0431706	0.588	MAPK1,MAPK12,MAPK14,MAPK3,MAPK8,PRDX6,PRKACA,RAC1,RAC3,SOD1
Synaptogenesis Signaling Pathway	0.0448445	0.358	AKT2,BAD,CAMK2A,CAMK2B,CAMK2D,CFL1,CRK,FGR,FYN,GRB2,LYN,MAPK1,MAPK14,MAPK3,NAPA,PRKACA,PRKCD,RAC1,SGTA,SHC1,SNCA,SRC,THBS1,YES1
*The ratio is calculated as the number of differentially expressed omics features in a given pathway divided by the total number of omics features that make up that pathway and that are in the reference set. Here we use the 1305 proteins in the analysis as the reference set.
